# Supplementary material for: Inhibition of Wdr5 Attenuates Ang-II-Induced Fibroblast-to-Myofibroblast Transition in Cardiac Fibrosis by Regulating Mdm2/P53/P21 Pathway
Source: MDPI journal article supplement (doi:10.3390/biom12111574), 2022-10-27
Supplement: s1 [file s1]

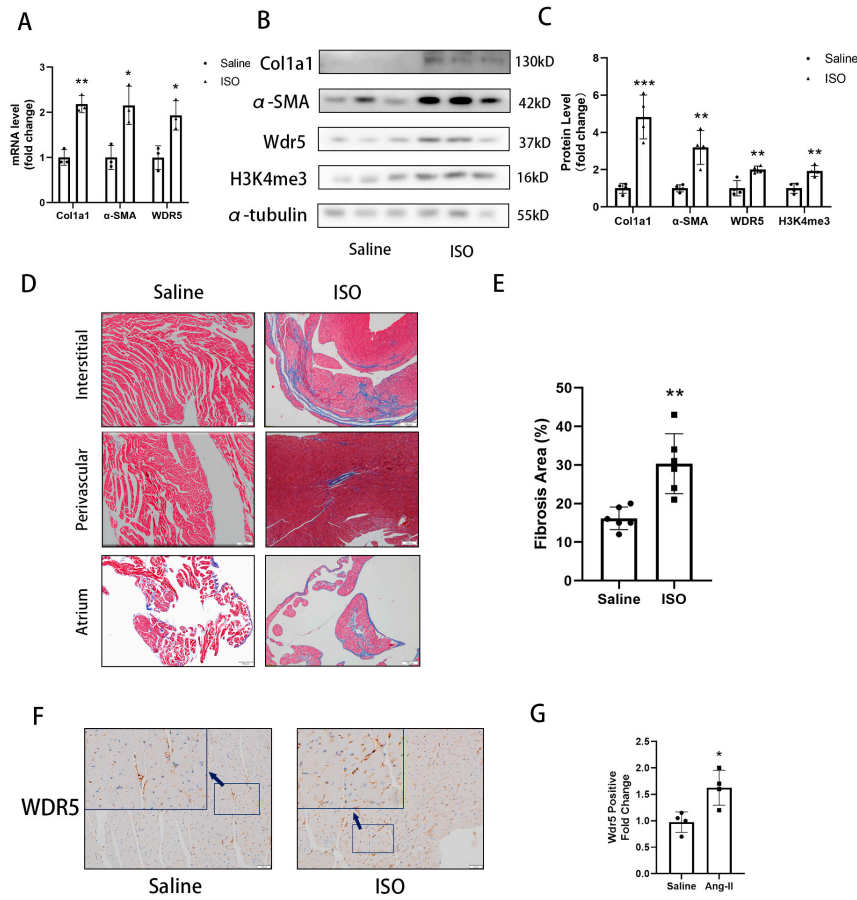

**Figure S1** WDR5 expression were elevated in ISO-induced cardiac fibrosis models

**A** Col1a1, α-SMA, and WDR5 mRNA levels were significantly elevated in ISO-infused animal models. **B** Col1a1, α-SMA, WDR5, and H3K4me3 protein levels were significantly increased in ISO-infused animal compared with saline group (n=4 in each group). **C** is the quantitative statistic of E graph. **D** Masson's trichrome staining showed increased fibrosis after 14 days of ISO injection. **E** is the quantitative statistic of fibrosis areas in D (n=6 in each group). **F** IHC results indicated that WDR5 proteins were upregulated in ISO injected animals (n=4). **G** is the quantitative analysis of F. \*p<.05, \*\*p<.01, \*\*\*p<.001, vs saline.

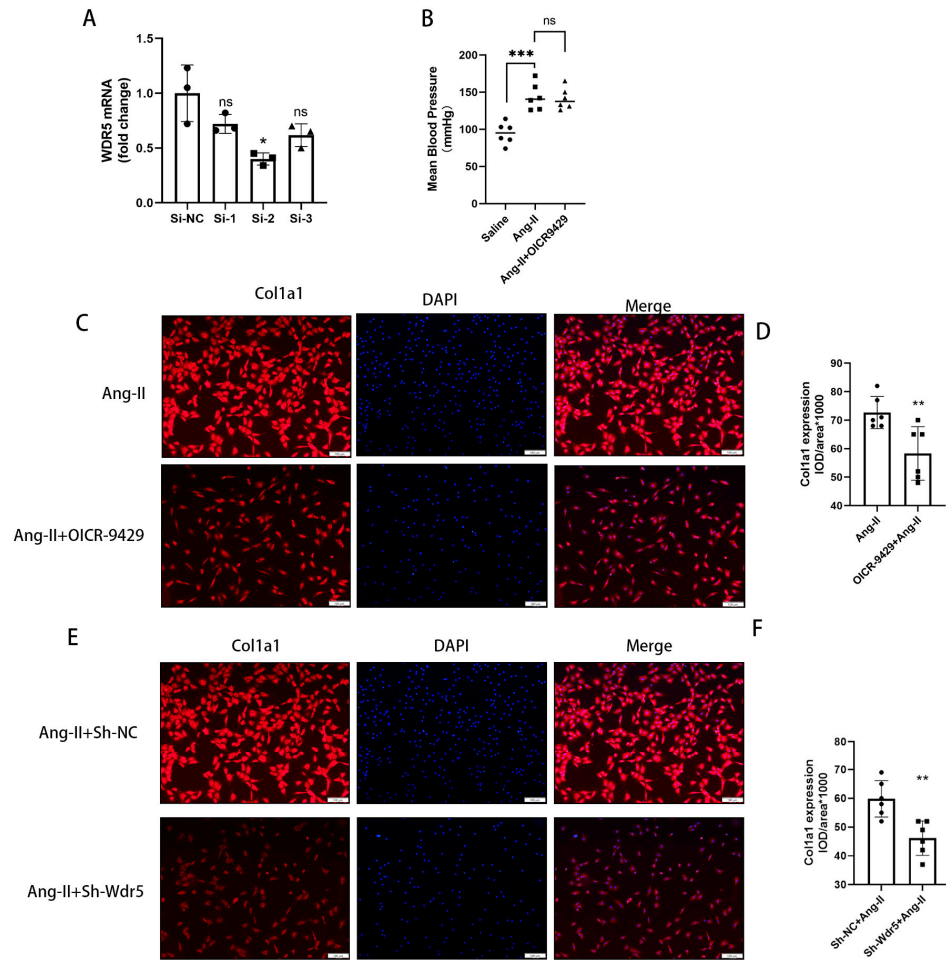

**Figure S2** Inhibition of Wdr5 reduced the expression of Col1a1 in NRCFs

**A** qPCR showed knockdown efficacy of different Sh-Wdr5 hairpin sequence. **B** Application of OICR9429 didn't affect the mean blood pressure level of mice. **C** Immunofluorescence analysis of Col1a1 demonstrated inhibited Col1a1 by OICR-9429 (red,  $\alpha$ -SMA; blue, DAPI) and **D** is the quantitative statics of graph C (n=6 in each group, >3 fields in each sample). **E** Immunofluorescence analysis of Col1a1 demonstrated inhibited Col1a1 expression by knocking down Wdr5 (red,  $\alpha$ -SMA; blue, DAPI) and **F** is the quantitative statics of graph E (n=6 in each group, >3 fields in each sample).

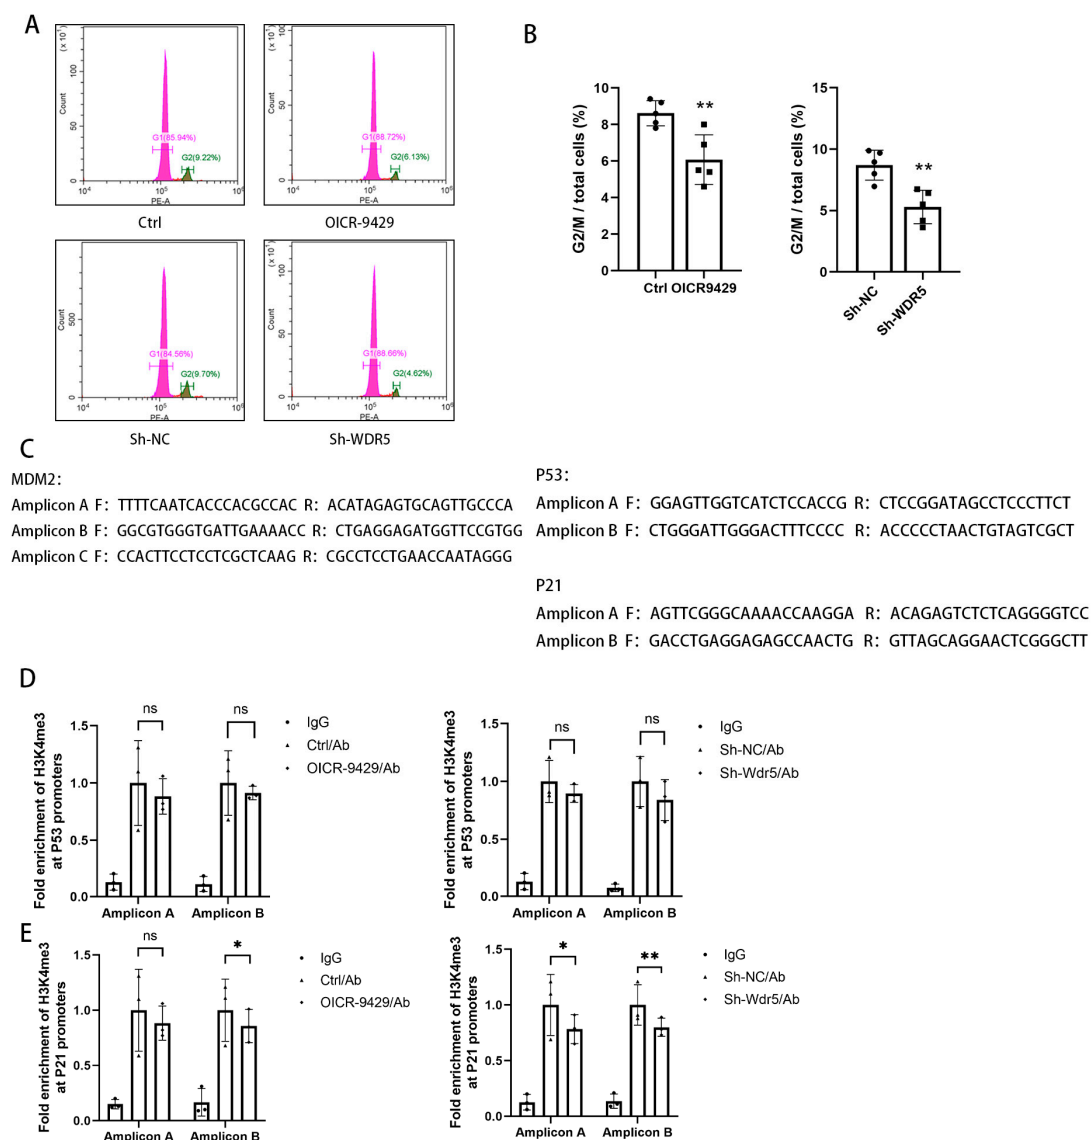

**Figure S3** Inhibition of Wdr5 didn't affect H3K4me3 enrichment at promoters of *p53* and *p21*  
**A** Flow CytoMetry analysis indicated G1 cell cycle arrested after pharmacology and genetic inhibition of Wdr5 and **B** is the quantitative statics of graph A. **C** Primer sequence of different Amplicons in Cut&Tag-qPCR. **D** and **E** Inhibition of Wdr5 had no effect on the H3K4me3 enrichment at *Mdm2* promoters.

**Table S1** Sequences of primers for genes analyzed by qRT-PCR (m-mouse, R-rat).

| Genes            | Forward Primers       | Backward Primers       |
|------------------|-----------------------|------------------------|
| Col1a1(m)        | GCTCCTCTTAGGGGCCACT   | CCACGTCTCACCATTGGGG    |
| $\alpha$ -SMA(m) | GTCCCAGACATCAGGGAGTAA | TCGGATACTTCAGCGTCAGGA  |
| Wdr5(m)          | CCAGTCTCAGCCGTTCAATTC | GTGTCCCAGATTCCGGCAGA   |
| Gapdh(m)         | AATGGATTGGACGCATTGGT  | TTTGCACCTGGTACGTGTTGAT |

|                  |                        |                        |
|------------------|------------------------|------------------------|
| Col1a1(R)        | GGAGAGAGCATGACCGATGG   | AAGTTCCGGTGTGACTCGTG   |
| $\alpha$ -SMA(R) | CATCCGACCTTGCTAACGGA   | AGTCCAGCACAATACCAGTTGT |
| Wdr5(R)          | CCAGTCTCAGCCGTTCAATTC  | GTGTCCCAGATTCCGGCAGA   |
| MDM2(R)          | CCGAGCGAAATGGTCTCTCA   | GGTATTGCACATTGGCCTGG   |
| P53(R)           | GGCAGACTTTTCGCCACAG    | CAGGCACAAACACGAACCTC   |
| P21(R)           | TGTGATATGTACCAGCCACAGG | CAGACGTAGTTGCCCTCCAG   |
| Gapdh(R)         | GCCGCATCTTCTTGTGCAG    | GGGTTTCCCGTTGATGACCA   |
